## 1180

## 2D and 3D assessment of the left ventricle volume and ejection fraction in a general population

Ericsson F.<sup>1</sup>; Tayal B.<sup>1</sup>; Hay Kragholm K.<sup>2</sup>; Zaremba T.<sup>1</sup>; Holmark Andersen N.<sup>1</sup>; Mogelvang R.<sup>3</sup>; Hagendorff A.<sup>4</sup>; Soegaard P.<sup>1</sup>

<sup>1</sup>Aalborg University Hospital, Department of Cardiology, Aalborg, Denmark

<sup>2</sup>Vendsyssel Hospital, Department of Cardiology, Hjørring, Denmark

<sup>3</sup>Rigshospitalet - Copenhagen University Hospital, Copenhagen, Denmark

<sup>4</sup>Leipzig University Hospital, Klinik und Poliklinik für Kardiologie, Leipzig, Germany

### Introduction

In standard practice, LV volumes and EF are estimated by 2D technique. 3D echocardiographic assessment seems more reliable; however, this method has not yet been validated in the general population.

### Purpose

To validate 3D echocardiography in a large population sample and investigate differences between 2D and 3D LVEF and volumes

### Methods

In The Copenhagen City Heart Study, 4466 echocardiograms were available for analysis. The echocardiograms were obtained during four consecutive heartbeats in both 2D and 3D with GE Vivid E9. Offline analysis was performed on EchoPac v. 201. LVEF was calculated by the modified Simpsons Biplane Auto EF for 2D and by the 4LVQ method for 3D.

### Results

The study included 2090 echocardiograms. The mean 2D LVEF was  $57.3 \pm 6.1\%$  (IQR 54 - 61%) and  $51.7 \pm 7.9\%$  (IQR 47 - 57%) by 3D. The mean end-diastolic volume (EDV) and end-systolic volume (ESV) by 2D and 3D techniques were: EDV 2D  $106.1 \pm 29.6$  ml vs EDV 3D  $128.2 \pm 32.3$  ml, ESV 2D  $45.7 \pm 15.6$  ml vs. ESV 3D  $45.7 \pm 20.7$ ,  $p < 0.05$  among all variables.

The average difference of means between 2D and 3D LVEF was  $5.6 \pm 11.2\%$ ,  $-22.1 \pm 56.8$  ml for EDV, and  $-16.9 \pm 32.9$  ml for ESV.

The correlation coefficient for LVEF was 0.42, EDV 0.76 and for ESV 0.70.

**Conclusion:** In our study, we found a significant difference in both LVEF and ventricular volumes when comparing 2D echocardiograms with 3D. 3D had, in general, lower LVEF, higher EDV and ESV compared to 2D.

Table 1: Summary of results

| Table 1 - Summary of results |     |     |                  |             | n = 2090 |
|------------------------------|-----|-----|------------------|-------------|----------|
| Variable                     | Min | Max | Mean             | IQR (25-75) | p-value  |
| LVEF, 2D (%)                 | 18  | 76  | $57.3 \pm 6.1$   | 54-61       | < 0.05   |
| LVEF, 3d (%)                 | 13  | 77  | $51.7 \pm 7.9$   | 47-57       | < 0.05   |
| EDV, 2D (ml)                 | 13  | 275 | $106.1 \pm 29.6$ | 85-123.8    | < 0.05   |
| EDV, 3D (ml)                 | 50  | 270 | $128.2 \pm 32.3$ | 106-148     | < 0.05   |
| ESV, 2D (ml)                 | 15  | 150 | $45.7 \pm 15.6$  | 35-54       | < 0.05   |
| ESV, 3D (ml)                 | 13  | 185 | $45.7 \pm 20.7$  | 48-74       | < 0.05   |

**LVEF:** left ventricle ejection fraction, **EDV:** end-diastolic volume, **ESV:** end systolic volume, **IQR:** Inter-quartile range  
 Abstract 1180 Figure 1: Correlation and BA-plot

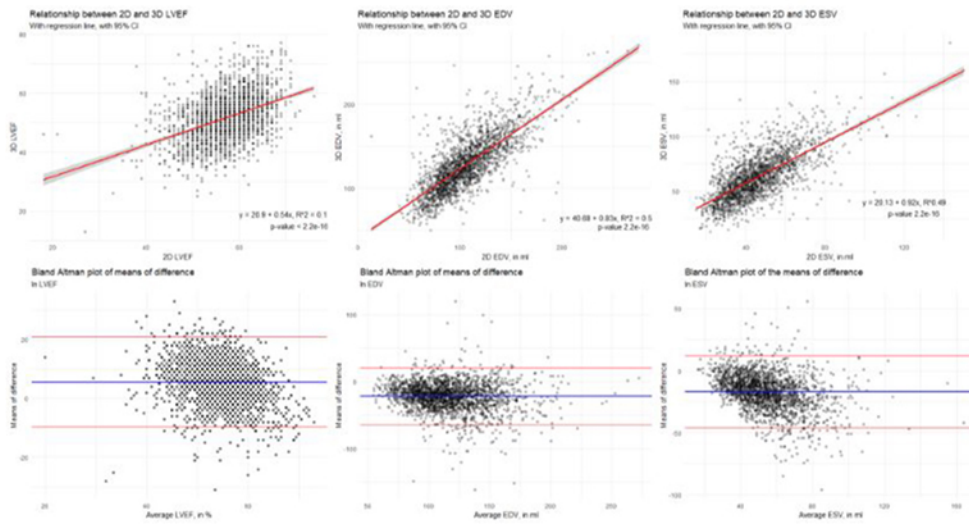

Source: http://academic.oup.com/ehjcimaging/article-pdf/21/Supplement_1/jez319.679/31864870/jez319.679.pdf
